# Supplementary material
Source: Elsevier journal article supplement (https://rcastoragev2.blob.core.windows.net/209339e6f42eb5bea19ac46445d16ee2/mmc1.pdf)
Supplement: mmc1 [file mmc1.pdf]

## Supplemental data

| Grade | Redness (mm) | Swelling (mm) | Pain                                                                                                      | Other                                                                                                                                                                                   |
|-------|--------------|---------------|-----------------------------------------------------------------------------------------------------------|-----------------------------------------------------------------------------------------------------------------------------------------------------------------------------------------|
| 0     | 0            | 0             | No pain at all                                                                                            | None                                                                                                                                                                                    |
| 1     | < 50         | < 20          | Painful to touch. No restriction in movement of arms, able to work, drive, carry heavy objects as normal  | Mild: Transient or mild discomfort (< 48 hours); no medical intervention/therapy required                                                                                               |
| 2     | 50 – 100     | 20 – 50       | Painful when limb is moved (i.e. restriction in range of movement in arm, difficulty in carrying objects) | Moderate: Mild to moderate limitation in activity - some assistance may be needed; no or minimal medical intervention/therapy required                                                  |
| 3     | > 100        | > 50          | Severe pain at rest (i.e. unable to use arm due to pain.)                                                 | Severe: Marked limitation in activity, some assistance usually required; medical intervention/therapy required, hospitalisation possible                                                |
| 4     | -            | -             | -                                                                                                         | Serious, life-threatening: Extreme limitation in activity, significant assistance required; significant medical intervention/therapy required, hospitalisation or hospice care probable |

Online Table A: **Severity grading scales** used to assess adverse events.

(a)

| Description      | Group 1: FP9-PP low dose<br>No. volunteers (%)<br>(n = 3) |          |          | Group 2: MVA-PP low dose<br>No. volunteers (%)<br>(n = 3) |          |          | Group 3: FP9-PP mid dose<br>No. volunteers (%)<br>(n = 3) |          |          | Group 4: MVA-PP mid dose<br>No. volunteers (%)<br>(n = 3) |          |          | Group 5: MVA-PP high dose<br>No. volunteers (%)<br>(n = 3) |          |          |
|------------------|-----------------------------------------------------------|----------|----------|-----------------------------------------------------------|----------|----------|-----------------------------------------------------------|----------|----------|-----------------------------------------------------------|----------|----------|------------------------------------------------------------|----------|----------|
|                  | Mild                                                      | Mod      | Severe   | Mild                                                      | Mod      | Severe   | Mild                                                      | Mod      | Severe   | Mild                                                      | Mod      | Severe   | Mild                                                       | Mod      | Severe   |
| Itch             | 3 (100%)                                                  |          |          | 2 (67%)                                                   |          |          | 3 (100%)                                                  |          |          | 2 (67%)                                                   |          |          | 3 (100%)                                                   |          |          |
| Pain             | 3 (100%)                                                  |          |          | 3 (100%)                                                  |          |          | 2 (67%)                                                   | 1 (33%)  |          | 2 (67%)                                                   | 1 (33%)  |          | 2 (67%)                                                    |          |          |
| Redness          | 2 (67%)                                                   | 1 (33%)  |          | 3 (100%)                                                  |          |          | 3 (100%)                                                  |          |          | 3 (100%)                                                  |          |          | 2 (67%)                                                    | 1 (33%)  |          |
| Scaling          | 3 (100%)                                                  |          |          | 3 (100%)                                                  |          |          | 3 (100%)                                                  |          |          | 3 (100%)                                                  |          |          | 3 (100%)                                                   |          |          |
| Swelling         | 2 (67%)                                                   | 1 (33%)  |          | 2 (67%)                                                   | 1 (33%)  |          | 1 (33%)                                                   | 2 (67%)  |          | 2 (67%)                                                   |          | 1 (33%)  | 1 (33%)                                                    | 2 (67%)  |          |
| Warmth           | 3 (100%)                                                  |          |          | 2 (67%)                                                   |          |          | 3 (100%)                                                  |          |          | 2 (67%)                                                   |          |          | 3 (100%)                                                   |          |          |
| <b>Total</b>     | <b>16</b>                                                 | <b>2</b> | <b>0</b> | <b>15</b>                                                 | <b>1</b> | <b>0</b> | <b>15</b>                                                 | <b>3</b> | <b>0</b> | <b>14</b>                                                 | <b>1</b> | <b>1</b> | <b>14</b>                                                  | <b>3</b> | <b>0</b> |
| Arthralgia       | 1 (33%)                                                   |          |          |                                                           |          |          | 1 (33%)                                                   |          |          |                                                           |          |          | 1 (33%)                                                    |          |          |
| Documented fever | 1 (33%)                                                   |          |          |                                                           |          |          | 1 (33%)                                                   |          |          |                                                           |          |          | 1 (33%)                                                    |          |          |
| Fatigue          | 3 (100%)                                                  |          |          |                                                           |          |          |                                                           |          |          | 2 (67%)                                                   |          |          | 3 (100%)                                                   |          |          |
| Feverish         | 2 (67%)                                                   |          |          |                                                           |          |          | 1 (33%)                                                   |          |          | 2 (67%)                                                   |          |          | 3 (100%)                                                   |          |          |
| Headache         | 2 (67%)                                                   |          |          | 1 (33%)                                                   |          |          | 1 (33%)                                                   |          |          | 3 (100%)                                                  |          |          |                                                            |          |          |
| Malaise          | 2 (67%)                                                   |          |          |                                                           |          |          |                                                           |          |          | 2 (67%)                                                   |          |          | 1 (33%)                                                    |          |          |
| Myalgia          | 3 (100%)                                                  |          |          | 1 (33%)                                                   |          |          | 1 (33%)                                                   |          |          | 1 (33%)                                                   |          |          | 2 (67%)                                                    |          |          |
| Nausea           |                                                           |          |          |                                                           |          |          |                                                           |          |          | 1 (33%)                                                   |          |          | 1 (33%)                                                    |          |          |
| <b>Total</b>     | <b>14</b>                                                 | <b>0</b> | <b>0</b> | <b>2</b>                                                  | <b>0</b> | <b>0</b> | <b>5</b>                                                  | <b>0</b> | <b>0</b> | <b>11</b>                                                 | <b>0</b> | <b>0</b> | <b>12</b>                                                  | <b>0</b> | <b>0</b> |

(b)

| Description      | Group 6 (FFM)                              |          |          |                                            |          |          |                                            |          |          | Group 7 (MMF)                               |          |          |                                            |          |          |                                            |           |          |
|------------------|--------------------------------------------|----------|----------|--------------------------------------------|----------|----------|--------------------------------------------|----------|----------|---------------------------------------------|----------|----------|--------------------------------------------|----------|----------|--------------------------------------------|-----------|----------|
|                  | Vaccine 1<br>No. volunteers (%)<br>(n = 9) |          |          | Vaccine 2<br>No. volunteers (%)<br>(n = 9) |          |          | Vaccine 3<br>No. volunteers (%)<br>(n = 8) |          |          | Vaccine 1<br>No. volunteers (%)<br>(n = 10) |          |          | Vaccine 2<br>No. volunteers (%)<br>(n = 9) |          |          | Vaccine 3<br>No. volunteers (%)<br>(n = 8) |           |          |
|                  | Mild                                       | Mod      | Severe   | Mild                                       | Mod      | Severe   | Mild                                       | Mod      | Severe   | Mild                                        | Mod      | Severe   | Mild                                       | Mod      | Severe   | Mild                                       | Mod       | Severe   |
| Itch             | 7 (78%)                                    |          |          | 5 (56%)                                    |          |          | 6 (75%)                                    |          |          | 9 (90%)                                     |          |          | 9 (100%)                                   |          |          | 7 (88%)                                    |           |          |
| Pain             | 7 (78%)                                    | 1 (11%)  |          | 6 (67%)                                    | 1 (11%)  |          | 7 (88%)                                    | 1 (13%)  |          | 8 (80%)                                     |          |          | 7 (78%)                                    |          |          | 5 (63%)                                    | 3 (38%)   |          |
| Redness          | 7 (78%)                                    | 2 (22%)  |          | 4 (44%)                                    | 5 (56%)  |          | 4 (50%)                                    | 4 (50%)  |          | 9 (90%)                                     | 1 (10%)  |          | 6 (67%)                                    | 3 (33%)  |          | 4 (50%)                                    | 4 (50%)   |          |
| Scaling          | 7 (78%)                                    |          |          | 9 (100%)                                   |          |          | 6 (75%)                                    |          |          | 10 (100%)                                   |          |          | 8 (89%)                                    |          |          | 6 (75%)                                    |           |          |
| Swelling         | 6 (67%)                                    | 3 (33%)  |          | 6 (67%)                                    | 3 (33%)  |          | 4 (50%)                                    | 4 (50%)  |          | 8 (80%)                                     | 2 (20%)  |          | 5 (56%)                                    | 3 (33%)  |          | 3 (38%)                                    | 5 (63%)   |          |
| Warmth           | 7 (78%)                                    |          |          | 7 (78%)                                    |          |          | 8 (100%)                                   |          |          | 7 (70%)                                     |          |          | 7 (78%)                                    |          |          | 7 (88%)                                    |           |          |
| <b>Total</b>     | <b>41</b>                                  | <b>6</b> | <b>0</b> | <b>38</b>                                  | <b>9</b> | <b>0</b> | <b>35</b>                                  | <b>9</b> | <b>0</b> | <b>51</b>                                   | <b>3</b> | <b>0</b> | <b>42</b>                                  | <b>7</b> | <b>0</b> | <b>32</b>                                  | <b>12</b> | <b>0</b> |
| Arthralgia       | 3 (33%)                                    |          |          | 4 (44%)                                    |          |          | 2 (25%)                                    |          |          | 2 (20%)                                     |          |          | 1 (11%)                                    |          |          | 4 (50%)                                    |           |          |
| Documented fever | 2 (22%)                                    |          |          | 2 (22%)                                    |          |          |                                            |          |          | 2 (20%)                                     |          |          |                                            |          |          | 1 (13%)                                    | 2 (25%)   |          |
| Fatigue          | 3 (33%)                                    |          |          | 4 (44%)                                    |          |          | 2 (25%)                                    |          |          | 1 (10%)                                     |          |          | 2 (22%)                                    |          |          | 2 (25%)                                    |           |          |
| Feverish         | 2 (22%)                                    |          |          | 4 (44%)                                    |          |          | 2 (25%)                                    |          |          | 5 (50%)                                     |          |          | 1 (11%)                                    |          |          | 6 (75%)                                    |           |          |
| Headache         | 2 (22%)                                    | 1 (11%)  |          | 3 (33%)                                    |          |          | 2 (25%)                                    |          |          | 3 (30%)                                     |          |          | 3 (33%)                                    |          |          | 5 (63%)                                    |           |          |
| Malaise          | 2 (22%)                                    |          |          | 3 (33%)                                    |          |          | 3 (38%)                                    |          |          | 3 (30%)                                     |          |          | 1 (11%)                                    |          |          | 5 (63%)                                    |           |          |
| Myalgia          | 3 (33%)                                    |          |          | 6 (67%)                                    |          |          | 4 (50%)                                    |          |          | 5 (50%)                                     |          |          | 2 (22%)                                    |          |          | 5 (63%)                                    |           |          |
| Nausea           |                                            |          |          |                                            |          |          | 1 (13%)                                    |          |          | 1 (10%)                                     |          |          | 1 (11%)                                    |          |          | 2 (25%)                                    |           |          |
| Other            |                                            |          |          |                                            |          |          |                                            |          |          |                                             |          |          | 1 (11%)                                    |          |          |                                            |           |          |
| <b>Total</b>     | <b>17</b>                                  | <b>1</b> | <b>0</b> | <b>26</b>                                  | <b>0</b> | <b>0</b> | <b>16</b>                                  | <b>0</b> | <b>0</b> | <b>22</b>                                   | <b>0</b> | <b>0</b> | <b>11</b>                                  | <b>0</b> | <b>0</b> | <b>30</b>                                  | <b>2</b>  | <b>0</b> |

Online Table B: **Frequency of vaccine-related AEs.** The number and proportion of volunteers reporting an AE at least once within the first month following vaccination is shown for (a) single dose groups and (b) prime-boost groups

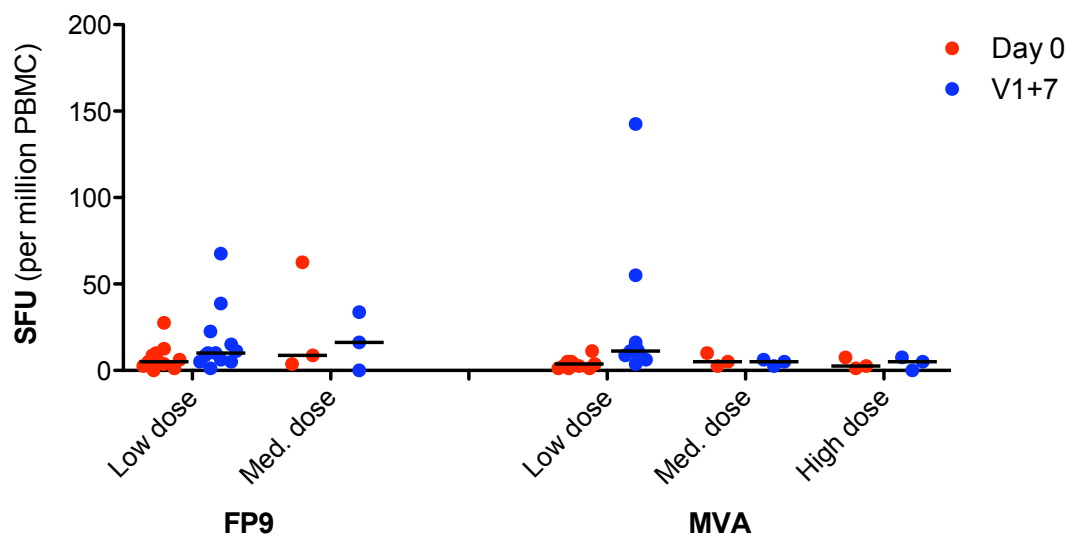

Online Figure A: **Non-specific responses.** *Ex-vivo* IFN $\gamma$ -ELISPOT responses to culture medium alone at baseline and 7 days following the first vaccination ('D0' and 'V1+7' respectively). Responses are displayed as spot forming units (sfu) per million PBMC. Horizontal lines represent the median.
